# Supplementary material for: “We want our therapist to talk with us about sexuality and gender diversity”: Qualitative perspectives of adolescents and professionals in youth mental health care.
Source: Research Square preprint supplement (doi:10.21203/rs.3.rs-2179255/v1), 2022-10-21
Supplement: Supplementary file 1 [file b77a4d1b2c409b8b17c3ae93.docx]

| **Appendix 1. Topic Guide for individual interviews with youth with a psychiatric condition** | |
| --- | --- |
| **Topics** | **Prompts** |
| **Introduction** | Explanation of study aims and procedures |
| **Demographics & background** | Age |
| Experienced gender |
| Sexual orientation |
| Reason for treatment /diagnosis |
| Sexual experienced or inexperienced (defined as “all types of sexual activity as experienced by the participant”, (child)sexual abuse excluded) |
| Cultural/faith background |
|  |
| **Gender identity** | Experienced interplay between gender identity and mental well being |
| Experiences with conversations about gender identity with your MHP |
| Opinion on communication about gender identity with a mental health care processional (MHP), including needs and wishes recommendations |
|  |
| **Sexual orientation** | Experienced interplay between sexual orientation and mental well being |
| Experiences with conversations about sexual orientation with your mental health care processional (MHP) |
| Opinion on communication about gender identity with a MHP, including needs and wishes recommendations |
|  |
| **Sexuality** | Experienced interplay between romantic relationships (incl. being in love, dating), sexuality and mental well being |
| Experiences with conversations about romantic relationships and sexuality sexuality with your MHP |
| Opinion on communication about romantic relationships and sexuality with a MHP, including needs and wishes recommendations |
|  |
| **Sexual side effects of psychotropic medication** | Experiences with conversations about sexual side effects of psychotropic medication sexuality with your MHP |
| Opinion on communication about romantic relationships and sexuality with a MHP, including needs and wishes and recommendations |
|  |
| **Recommendations for communication** | Other recommendations for MHPs to enable conversations about sexuality and genderdiversity |
| **Extra questions on cultural and religious influences** |  |
|
| **Gender identity** | Experiences with your culture/environment/religion with regard to people with a different gender identity/gender nonconformity |
| Experienced interplay between gender identity and mental well being |
| Opinion about discussing these topics with young people of all cultures/religions |
| Needs, wishes and recommendations for MHPs to discuss these topics with youth with different backgrounds |
|  |
| **Sexual Orientation** | Experiences with your culture/environment/religion with regard to people with questions about their sexual orientation |
| Experienced interplay between sexual orientation and mental well being |
| Opinion about discussing these topics with young people of all cultures/religions |
| Needs, wishes and recommendations for MHPs to discuss these topics with youth with different backgrounds |
|  |
| **Sexuality** | Experiences with your culture/environment/religion with regard to youth romantic relationships, sexuality/sexual development |
| Experienced interplay between romantic relationships, sexuality and mental well being |
| Opinion about discussing these topics with young people of all cultures/religions |
| Needs, wishes and recommendations for MHPs to discuss these topics with youth with different backgrounds |
|  |
|  |  |
